# Minireview: The Adipocyte—At the Crossroads of Energy Homeostasis, Inflammation, and Atherosclerosis

MICHAEL W. RAJALA AND PHILIPP E. SCHERER

*Department of Cell Biology (M.W.R., P.E.S.) and Diabetes Research and Training Center (P.E.S.), Albert Einstein College of Medicine, Bronx, New York 10461*

Adipose tissue evolved to efficiently store energy for times of caloric restriction. The large caloric excess common in many Western diets has negated the need for this thrifty function, leaving adipose tissue ill-equipped to handle this increased load. An excess of adipose tissue increases risk for a number of conditions including coronary artery disease, hypertension, dyslipidemias, type 2 diabetes, and even cancer. Indeed, the ability of the adipocyte to function properly when engorged with lipid can lead to lipid accumulation in other tissues, reducing their ability to function and respond normally. The role of adipose tissue as an endocrine organ capable of secreting a number of adipose tissue-specific or enriched hormones, known as adipokines, is gaining appreciation. The nor-

mal balance of these adipose tissue secretory proteins is perturbed in obesity. Paradoxically, the lack of normal adipose tissue, as seen in cases of lipodystrophy and lipoatrophy, is also associated with pathologic sequelae similar to what is seen with obesity. The pathologic findings associated with lack of adipose tissue, largely due to inability to properly store lipids, may also be due to a lack of adipokines. In this review, we highlight the role of adipose tissue as an endocrine organ focusing on some of the recent advances in the identification and pharmacological characterization of adipokines as well as their regulation in the context of obesity and insulin-resistant states. (*Endocrinology* 144: 3765–3773, 2003)

THE ADIPOCYTE IS a remarkable cell type in several respects. It stores excess energy in the form of lipids and is thus able to dramatically change its size in accordance with changing metabolic needs. This ability gives adipose tissue an almost unlimited capacity for growth, making it perhaps the only tissue in the body with the ability to so drastically increase its size without an underlying transformed cellular phenotype. Adipose tissue is responsive to both central and peripheral metabolic signals and is itself capable of secreting a number of proteins (see Fig. 1). These adipocyte-specific or enriched proteins, termed adipokines, have been shown to have a variety of local, peripheral, and central effects that will be discussed below. Adipose tissue is therefore able to integrate signals from other organs and respond by regulating secretion of multiple proteins. As an active participant in whole body energy homeostasis, adipose tissue can negatively influence other systems when dysregulated. Although adipocytes are capable of increasing in size, the cellular homeostasis and the secretory profile of larger adipocytes becomes altered and increasingly dysregulated compared with adipocytes of smaller size (1). Although the total number of adipocytes is increased with increasing fat mass, the increased number and percentage of these large adipocytes may partially account for the inability of adipose tissue to function properly and contribute to some of the problems associated with obesity.

The prevalence of obesity is rapidly reaching epidemic proportions in developed nations (2–4). The detrimental ef-

fects of increased adiposity on public health are beginning to weigh heavily on health care systems worldwide. Obesity is a major risk factor for a number of disorders including hypertension, coronary artery disease (CAD), dyslipidemias, and type 2 diabetes. The molecular mechanisms underlying many of these associations are not yet completely characterized. Paradoxically, similar disorders are also observed in lipodystrophic patients and genetic mouse models that completely lack adipose tissue (5, 6). Studies with these lipodystrophic and other mouse models have demonstrated that adipose tissue is an active endocrine organ that secretes numerous proteins necessary for normal physiologic homeostasis (7, 8). The metabolic abnormalities observed with lipodystrophy may be due to the lack of adipokines and/or to the increase in fatty acids in cells other than adipocytes. The latter is generally referred to as “lipotoxicity” as normal cellular function and insulin signaling can be impaired in nonadipose cells with increased intracellular accumulation of fatty acids (9). The systemic effects of decreased insulin sensitivity associated with obesity may be a reflection of the lipotoxic effects of fatty acids as well as an imbalance of adipokines. Indeed, providing lipodystrophic mice with adipose tissue implants, thus supplying a sink for fatty acids as well as a supply of adipokines, reversed many of the metabolic abnormalities seen in these mice (7, 8). Additionally, the exogenous treatment of these lipodystrophic mice with select adipokines alone had similar effects (10). This may be due in part to the ability of adipokines to reduce fatty acids in nonadipose tissue, although adipokines have other functions on insulin sensitivity independent of this action (5, 10). Importantly, lipotoxicity and the dysregulation of adipokines should not be viewed as independent, but rather intertwined processes that are each capable of mutually influencing or even causing the other.

Abbreviations: AMPK, 5'-AMP-activated protein kinase; ASP, acylation-stimulating protein; BMI, body mass index; CAD, coronary artery disease; CRP, C-reactive protein; FL-Ad, serum adiponectin; gAD, globular trimer; JNK, c-Jun amino-terminal kinase; PPAR, peroxisome proliferator-activated receptor; SAA, serum amyloid A; TZD, thiazolidinedione.

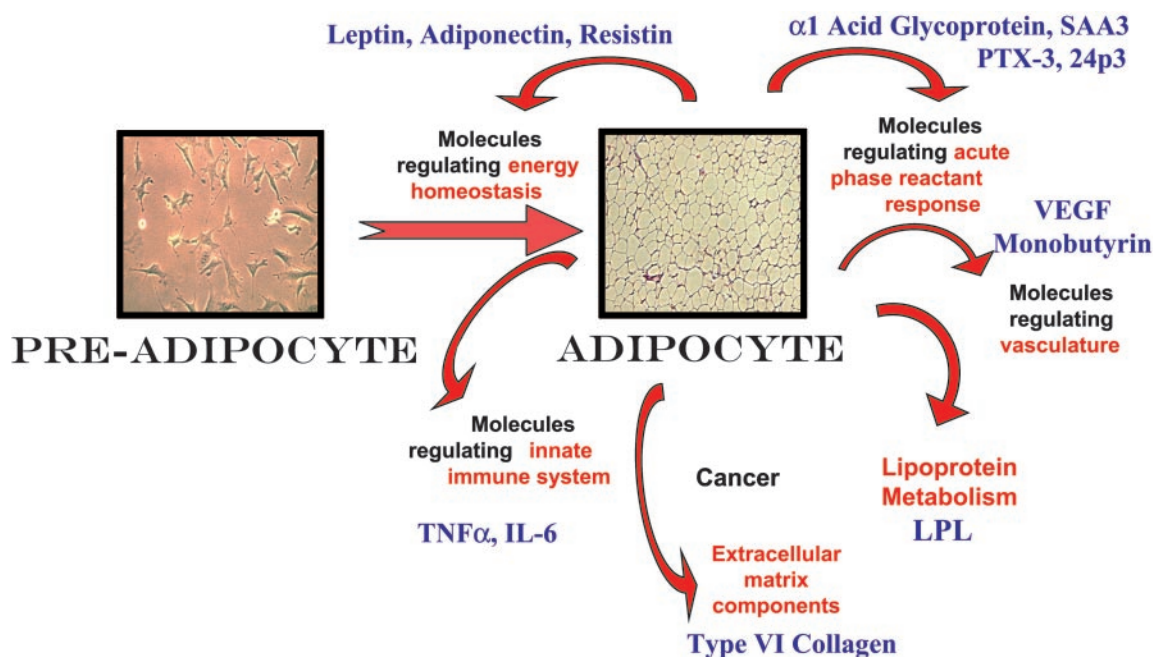

FIG. 1. Schematic overview of the altered secretory profile associated with terminal fat cell differentiation. A few representative examples are indicated for each category.

### The Adipocyte and Energy Homeostasis

#### Leptin

Leptin was first described when it was positionally cloned as the monogenic mutation responsible for the morbidly obese phenotype observed in the *obese (ob/ob)* mouse (11). Leptin is a highly conserved 16-kDa hormone that is predominately expressed in adipose tissue and is found both in circulation and cerebrospinal fluid. Circulating leptin levels are positively correlated with body mass index (BMI) with concentrations in human serum at approximately 1–10 ng/ml (12). Leptin crosses the blood brain barrier by a saturable transport system and effectively serves as an afferent signal to the central nervous system originating from adipose tissue. One site of leptin action is in the arcuate nucleus of the hypothalamus in a region known to control the regulation of food intake. Centrally, it is capable of altering food intake, body weight, energy expenditure, and neuroendocrine function, whereas it also has peripheral effects on skeletal muscle, liver, pancreas, adipose tissue, and numerous other cell types (13). The accompanying review by Zigman and Elmquist (14) focuses on the central role of leptin action.

Leptin injection can reduce body weight and fat mass by increasing energy expenditure and decreasing food intake (15). The weight loss induced by leptin administration differs from simple reduction in food intake (15–17). Additionally, leptin-administered animals do not display a rise in serum free fatty acids or ketones associated with rapid weight loss in food-restricted animals (18).

The mechanism by which leptin is capable of exerting its metabolic affects has been an area of intense research. A recently reported mechanism is based on the observation that leptin is capable of activating 5'-AMP-activated protein kinase (AMPK) in muscle and liver both by acting directly on these tissues and by acting centrally through the central

nervous system (19, 20). When activated, AMPK decreases ATP-consuming anabolic pathways such as glucose-regulated transcription, protein synthesis, cholesterol synthesis, and fatty acid and triglyceride synthesis, and it also increases ATP-producing catabolic pathways such as increased glucose transport,  $\beta$  oxidation, glycolysis, and mitochondrial biogenesis. Patients with lipodystrophy have significant lipid droplets in liver and muscle. Administration of leptin to these patients significantly increases insulin sensitivity, improves serum lipid profiles, and decreases lipid accumulation in liver and muscle (21, 22).

Beyond its central metabolic functions, leptin has profound effects on a number of other physiologic processes, such as fertility and normal immune function (23). The influence of leptin in immune function can be clearly seen in the context of nutritional status. Normal immune function is suppressed during times of nutritional deprivation, a state associated with low levels of circulating leptin. The immunosuppression associated with acute starvation is reversed when leptin is exogenous administered (24). In line with these observations, *ob/ob* mice have impaired T cell immunity (25). Leptin also alters the regulation of hormones in the hypothalamus-pituitary-adrenal axis and affects GH, prolactin, and a number of other anterior pituitary hormones (26). Similar to other hormones, diurnal and ultradian leptin rhythms have been identified with peak circulating levels at night reaching the nadir in the morning. This rhythm can be altered by meal timing but does not seem to be entrained by the circadian clock (27).

The relevance of leptin in normal human metabolic function is evident from leptin replacement therapy to a small number of individuals with leptin deficiency due to chromosomal mutations (see accompanying review by O'Rahilly *et al.*, Ref. 28). Studies with diet-induced obese mice showed

that these mice were resistant to the effects of leptin administration (29). It has been postulated that a leptin resistance can develop in the face of high circulating levels of the hormone. This is supported by the fact that leptin levels are increased in most mouse models of insulin resistance associated with obesity. The effectiveness of intracerebral ventricular injections of leptin in a number of models of genetic and diet induced obesity suggest that leptin resistance can occur at several levels, from the transport across the blood brain barrier, to downstream targets of the receptor (reviewed in Ref. 30). The inability of high endogenous leptin to prevent weight gain may partly be explained by the reduced cerebrospinal fluid:peripheral ratio of leptin in obese individuals (31). Leptin may have evolved to deal with limited energy availability, and its main function may be to mediate responses necessary to increase those energy stores, *i.e.* including effects on feeding behavior (12). As such, it is unfortunately not capable of preventing overconsumption or obesity and does not appear to be a viable treatment for obesity at this stage.

### Adiponectin

Adiponectin is a 30-kDa adipose-specific secreted protein that circulates in human serum at 5–30 nM concentrations, with circulating levels approximately two to three times higher in females than in males (32, 33). The mature protein consists of an amino-terminal collagen-like domain and a carboxy-terminal head domain with structural similarities to complement factor C1q. Serum adiponectin (FL-Ad) is found as a low-molecular-weight complex consisting of a dimer of trimers as well as a high-molecular-weight complex consisting of up to six trimers (34). A third form, generated by cleavage of the collagenous stalk region that results in globular trimer (gAd), has not conclusively been shown to exist as a physiological intermediate but has potent pharmacological activity (35).

An analysis of obesity-prone rhesus monkeys that often progress to type 2 diabetes examined the plasma concentration of adiponectin longitudinally (36). A decrease in circulating FL-Ad was seen with increasing BMI (37). This decrease in FL-Ad strongly correlated with the concomitant decrease in insulin sensitivity. Although the relationship between insulin action and adiponectin plasma levels is independent of body adiposity, the levels of FL-Ad are almost always decreased in obesity. Human studies focusing on Pima Indian and Japanese cohorts demonstrated an association between low plasma adiponectin levels and obesity and type 2 diabetes (38, 39). Adiponectin levels were negatively correlated with the degree of hyperinsulinemia and insulin resistance in both ethnic groups. Moreover, relatively moderate weight loss can lead to a significant increase in circulating FL-Ad levels, demonstrating that the decrease in adiponectin serum concentration is reversible (40). Importantly, this rise in serum FL-Ad mirrors the increase in insulin sensitivity seen with reduction in adipose tissue mass. Spranger *et al.* (41) have recently shown that baseline plasma adiponectin levels in apparently healthy individuals are independently associated with future risk for the development of type 2 diabetes.

Further genetic studies examined whether polymorphisms in the locus for adiponectin, 3q27, could affect the circulating levels of adiponectin and whether these polymorphisms were associated with increased risk for the development of type 2 diabetes. The results of one study showed evidence of linkage with metabolic syndrome (42), whereas another showed evidence of a type 2 diabetes susceptibility locus at 3q27-qter in a French population with early-onset diabetes. Polymorphisms within the adiponectin locus were also linked with increased risk for type 2 diabetes in a Japanese cohort (43). Study of a missense mutation in the globular head domain of FL-Ad found in another Japanese cohort was associated with low plasma adiponectin and type 2 diabetes. All carriers of one of these missense mutations exhibited at least one feature of metabolic syndrome (44). A concise summary of the available genetic data is provided by Vasseur *et al.* (45).

Peroxisome proliferator-activated receptor (PPAR)  $\gamma$  agonists increase expression and plasma concentrations of adiponectin (46, 47) as well as decrease plasma TNF $\alpha$  concentration. TNF $\alpha$  is increased locally in adipose tissue in obesity, and it is possible that the higher levels of TNF $\alpha$  may be due to suppressed adiponectin levels *in vivo* (48). TNF $\alpha$  has been shown to reduce adiponectin expression in adipocytes in a dose-dependent manner (49). Elevated TNF $\alpha$  levels have been reported in the adiponectin knockout mouse. Introduction of adiponectin by adenoviral infection normalized serum TNF $\alpha$  in these mice. Overexpression of gAd in the apolipoprotein E (ApoE)  $-/-$  mouse model demonstrated that overexpression of gAd reduces the severe atherosclerosis and increased TNF $\alpha$  and class A scavenger receptors typically seen in apolipoprotein E (ApoE)  $-/-$  mouse (50). Similarly, an increase in atherosclerotic plaque formation can be observed in adiponectin null mice compared with wild-type mice after induced vascular injury (51). Furthermore, diabetics with CAD have been shown to have less adiponectin than diabetics without CAD (38).

Impairment of insulin secretion and a decrease in peripheral sensitivity to insulin characterize the pathogenesis of type 2 diabetes. Together, they result in increased hepatic glucose production and impaired peripheral glucose clearance by muscle and fat. Mouse models that carry specific genetic lesions that affect insulin sensitivity directly at the level of the fat cell often have altered adipokine profiles that may partially explain their phenotype. Fat cell-specific ablation of the insulin receptor (FIRKO) causes increased serum adiponectin levels (1). Conversely, the massive down-regulation of the insulin receptor observed in adipocytes isolated from caveolin-1 knockout mice (52) results in a dramatic reduction of adiponectin levels in serum (53). The ablation of insulin-stimulated glucose uptake in adipocytes by tissue-specific ablation of the glucose transporter GLUT4 results in impaired insulin sensitivity in muscle and liver, with evidence pointing at an adipokine (or lack thereof) as a causative factor for the insulin resistance seen in liver and muscle (54). All of these mouse models that interfere with insulin signaling or downstream events (such as glucose transport) in the adipocyte have profound effects on adiponectin levels in serum and emphasize the importance of insulin signaling in the feedback loop that controls serum levels of adiponectin.



Studies in mice examined the effect of recombinant adiponectin on insulin sensitivity and lipid metabolism. Injection of mice with FL-Ad was found to decrease gluconeogenesis in the liver and peripheral lipid accumulation in nonadipose tissues (55). The reduction in gluconeogenesis was due to decreased expression of glucose-6-phosphatase (G6Pase) and phosphoenolpyruvate carboxykinase (PEPCK) and resulted in reduced hepatic glucose production (47). The ability of FL-Ad to acutely lower serum glucose was independent of any change in insulin secretion (47). Additionally, this suppression of glucose production was reproduced *in vitro* in isolated primary hepatocytes. The treatment of mice with gAd increased glucose uptake and fatty acid oxidation in muscle and decreased lipid accumulation in muscle. gAd injection into mice exposed to a high-fat, high-sucrose diet induced weight loss without decreasing food intake (35). Overexpression of gAd in transgenic mice in the background of the *ob/ob* mutation reverses insulin resistance without affecting body weight (50). Fatty acid oxidation was increased in skeletal muscle and expression of uncoupling proteins-2 and -3 were up-regulated (50).

Similar to the peripheral effects of leptin, it is possible that gAd increases insulin sensitivity in muscle by increasing FA oxidation, thereby decreasing intramyocellular lipid accumulation. Adiponectin affects glucose metabolism and insulin sensitivity through activation of AMPK. Treatment of muscle cells *in vitro* with Ad leads to stimulation of  $\beta$  oxidation and glucose uptake. Dominant-negative AMPK transfected into myocytes blocked adiponectin-mediated phosphorylation of acetyl-CoA carboxylase 1 (ACC1), a downstream target of AMPK (56). Adenoviral infection of dominant-negative AMPK significantly decreased the glucose-lowering effect of FL-Ad *in vivo* and blunted the FL-Ad-mediated repression of gluconeogenic enzymes. Even though some light has been shed on the intracellular events taking place upon adiponectin treatment, major gaps still exist with respect to the identification of a receptor and which membrane-proximal signaling modules are used to trigger the transcriptional changes observed.

### Resistin

Resistin is a 10-kDa adipose tissue-specific hormone that was recently identified in a screen designed to enrich for transcripts that were up-regulated during adipogenesis but decreased with PPAR $\gamma$  agonist treatment (57). Injection of resistin into wild-type mice resulted in reduced glucose tolerance and insulin action, whereas injection of neutralizing antibodies into diabetic obese mice improved insulin action (57). We recently published the acute *in vivo* effects of resistin on glucose production, glucose clearance, and insulin action in insulin-clamped rats (58). When resistin was infused at near physiological levels in the presence of physiologically high circulating insulin, lower rates of glucose infusion were necessary to maintain basal glucose levels. The insulin resistance caused by resistin infusion was completely attributed to an increase in the rate of glucose production and not to an increase in glucose uptake. This indicates that resistin has a clear and rapid effect on hepatic, but not peripheral, insulin sensitivity (58). However, other groups have shown

resistin mRNA in most mouse models of insulin resistance to actually be down-regulated (59). Additionally, although the human resistin gene promoter has been shown to have binding sites for ADD-1/SREBP-1c (adipocyte determination and differentiation factor 1/sterol regulatory element binding protein 1c) and C/EBP $\alpha$  (CCAAT/enhancer-binding protein  $\alpha$ ), two transcription factors that have important roles in adipogenesis (60), resistin expression in human adipocytes was very low within human adipose tissue explants (61, 62). In fact, human resistin expression was higher in monocytes (62) and other nonadipocyte cells of adipose tissue (63) than in adipocytes. Furthermore, some studies have failed to show a link between resistin levels and BMI or insulin sensitivity (61, 64, 65) whereas others argue for such a connection (66–68).

Although these studies shed doubt on a role of resistin in insulin resistance associated with obesity, it is possible that serum levels do not correlate with tissue mRNA or protein levels, a phenomenon observed for other adipokines under certain conditions (32). The majority of published papers on resistin make conclusions based only on resistin transcript levels and lack serum concentrations of the secreted, mature protein due to the difficulty in measuring serum resistin. Caution should therefore be used in interpreting studies ruling out a role for resistin based only on mRNA or cellular protein levels. Further studies focusing on serum resistin concentrations, as well as development of knockout and transgenic mouse models and the identification of a receptor, will be necessary to determine the clinical relevance of resistin in obesity and in the development of insulin resistance.

### Acylation-stimulating protein (ASP)

ASP is produced by a two-step process involving three proteins of the alternate complement system: C3, factor B, and adipsin. All three of these precursor proteins are produced and secreted by adipocytes (69). ASP increases lipogenesis locally in adipocytes and inhibits hormone-sensitive lipase-mediated lipolysis. Mice lacking complement factor C3 (and therefore deficient in ASP) display greater caloric intake with normal fat absorption but are significantly leaner (70). These mice are therefore resistant to diet-induced weight gain and display increased postprandial free fatty acid levels. ASP levels are elevated in obese humans and decrease after fasting or weight loss (71).

### Adipokine Secretion

The regulation of synthesis and release of secretory proteins from adipose tissue is complex. To date, there is still no convincing report describing a triggered secretory pathway similar to the pathways found in neuroendocrine cells. The insulin-mediated translocation of Glut4 containing vesicles from an intracellular compartment to the plasma membrane has been extensively studied. However, due to the constant cycling of these vesicles to and from the plasma membrane, they do not represent an attractive vehicle for triggered release of soluble constituents. No other secretory marker proteins have been described that reside in a triggered exocytic compartment. However, several reports have described an insulin-mediated increase in release of some components (33,

72, 73). Most likely, this reflects a stimulation of the release of proteins from the endoplasmic reticulum or an early Golgi compartments followed by trafficking through constitutive secretory routes to the plasma membrane. Further regulation occurs at the level of conventional transcriptional and translational modulation. As mentioned previously, levels of transcript and intracellular protein in the secretory pathway may not actually correspond with actual secretion of protein from adipose tissue (32), and thus further study will be necessary to understand the intricacies of the secretory pathway in adipocytes.

### The Adipocyte as a Source and Target for Inflammation

Obesity is associated with an increase in TNF $\alpha$  production in adipose tissue (74). The locally elevated TNF $\alpha$  directly interferes with proper insulin signal transduction through specific phosphorylation of critical serine residues in the insulin receptor and insulin receptor substrate-1, thereby leading to a local desensitization to insulin signaling (75). In addition to local increases in TNF $\alpha$ , a systemic increase in inflammatory markers has been shown to be associated with obesity. C-reactive protein (CRP) is an unspecific acute phase reactant that serves as an excellent indicator of systemic inflammation (76). Insulin resistance is not only associated with a significant increase in CRP, but a whole host of additional acute phase reactants that are elevated as well. Many of these additional factors including IL-6,  $\alpha$ 1 acid glycoprotein, and serum amyloid A (SAA) are expressed in adipose tissue (77). All of these proteins (with the exception of CRP) are up-regulated in adipose tissue in the insulin-resistant state. Increased serum IL-6 is predictive of future cardiovascular problems (78). SAA can effectively compete for binding of apolipoprotein A-I on high-density lipoprotein particles, thereby altering trafficking of these particles (79).

Additional acute phase reactants produced in adipocytes include the pentraxin family member PTX-3 (80), which is closely related to CRP, as well as the lipocalin 24p3 (77), whose roles in the innate immune response and as an iron binding protein have recently been established (81, 82). Additionally, ceruloplasmin and macrophage migration inhibitory factor have also been identified as secretory products of adipocytes, albeit it is not known whether expression of these proteins is altered with the development of insulin resistance (83, 84). Interestingly, the antiinflammatory factor IL-1 receptor antagonist (IL-1Ra) is also expressed in adipose tissue where it is significantly up-regulated in obesity, concomitant with an increase in systemic IL-1 receptor antagonist levels (85).

It is technically difficult to gauge the relative contribution of adipocytes to the systemic levels of these proteins in any given metabolic state. However, in a direct comparison, adipocytes have a proinflammatory potential equal or superior to that of macrophages with respect to a subset of inflammatory markers (86). Combined with the highly significant biomass that adipocytes can contribute to whole body weight, particularly in obese individuals, there is little doubt that the systemic contribution of adipose tissue is significant. As an example, increased systemic TNF $\alpha$  was seen in the

recently described adiponectin knockout mouse with adipose tissue being the only tissue examined with a significant increase in TNF $\alpha$  expression (48). This demonstrates that an adipose-specific increase in an inflammatory cytokine was capable of translating into a significant systemic increase in concentration.

The potential of the adipocyte as a potent source for acute phase reactants can be understood on the basis of the specific transcription factors that are expressed. Many of the general factors involved in the acute phase reactant response in the liver, such as the members of the C/EBP family, are also abundantly expressed in the adipocyte. Specific transcription factors, such as SAA-enhancing factor that has been shown to play an important role in the dramatic induction of SAA in the liver (87), are also strongly induced during adipogenesis (our unpublished observations). Although we can phenomenologically describe the close functional relationship between the adipocyte, macrophage, and some specialized hepatocyte functions, we struggle to explain the teleological rationale for coupling the innate immune response with energy homeostasis. Nevertheless, it seems to be desirable across species and phyla, to use a single cell as an integrator for both immune and metabolic function. In flies, the fat body not only serves for energy storage and assumes primitive liver functions but also serves as primary coordinator of the innate immune response (88). Analogous to these evolutionarily more primitive systems, we expect that mammalian adipocytes produce a host of bacteriostatic and bacteriocidal factors, an area that has remained vastly unexplored thus far. It is likely that a complex cross-talk exists between adipocytes and the closely juxtaposed cells within the stroma of adipose tissue, such as macrophages. A recent paper by Charriere *et al.* (89) calls attention to the close relationship between the adipocyte and macrophages lineages. Injection of the well-established 3T3-L1 preadipocyte cell line into the peritoneum of nude mice resulted in the induction of a number of highly macrophage-specific surface markers, indicating that these cells effectively *trans*-differentiate into macrophages *in vivo* (89).

Although PPAR $\gamma$  agonists, such as the thiazolidinediones (TZDs), may exert their antidiabetic effects at least in part on the basis of gene induction of adipocyte-specific polypeptides with beneficial activity on insulin sensitivity, the anti-inflammatory effects of TZDs on adipocytes may be equally important. TZDs significantly reduce the production of SAA in adipocytes of diabetic mice and prevent the TNF $\alpha$ -mediated repression of adiponectin production (77).

The close connection between inflammation and insulin resistance has been further underscored by recent findings of the Shoelson and Hotamisligil groups. Treatment with high doses of salicylates can reverse the insulin resistance in obese and diet-induced diabetic mouse models by inhibiting IKK $\beta$ . They have further shown these positive antiinflammatory effects on insulin sensitivity in humans and point to IKK $\beta$  as a new therapeutic target for type 2 diabetes (90–92). The proinflammatory c-Jun amino-terminal kinase (JNK) pathway has been implicated in insulin resistance in cultured cells. *In vivo*, JNK activity is abnormally elevated in obesity. Mice carrying a chromosomal deletion of JNK1 display reduced adiposity, significantly improved insulin sensitivity

and enhanced insulin receptor signaling (93). Future studies will have to determine the importance of these proinflammatory cascades in adipose tissue vis-à-vis the adipokine profile and systemic insulin sensitivity.

### Effects on Vasculature and Additional Stromal Interactions

The microvasculature within adipose tissue is rather unique. As adipose tissue has enormous growth potential given the appropriate metabolic challenge, it displays a high degree of plasticity with respect to its vascularization. Folkman and colleagues (94) have recently speculated that neovascularization may be critical for adipose tissue growth. They showed that systemic treatment with an angiogenesis inhibitor resulted in weight reduction and adipose tissue loss in various mouse models of obesity. Independently, Spiegelman and colleagues (95–97) have identified monobutyrin as a highly adipose-enriched proangiogenic lipid derivative that may serve as an endogenous factor important in neovascularization during adipose tissue expansion. Additionally, it is possible that vascular endothelial growth factor-1, which is also expressed locally in adipose tissue, may contribute toward this process (98). Further research will determine whether angiogenesis in adipose can be targeted in a tissue-specific manner.

### Adipokines and Cancer

Epidemiological studies have identified obesity as one of the major risk factors for cancer. A recent prospective study on 900,000 adults in the United States by Calle *et al.* (99) showed an association between increased BMI and risk of death from all cancers over a period of 16 yr. The conceptual importance of the critical cross-talk between cancer cells and the surrounding stromal cells has become increasingly accepted (100, 101). These contributions may be particularly prominent in adipocyte-rich environments, such as mammary gland or bone marrow, as obesity has been established as a significant risk factor for the development of breast cancer in postmenopausal, but not premenopausal women (102). A unique feature about early stage breast cancers that arise from ductal epithelial cells is the fact that they critically depend on an adipocyte-enriched milieu for survival and growth. Elliott and colleagues (103) showed that adipocyte-rich environments facilitate SP1 (a murine mammary carcinoma cell line) growth after injection into mice. Subcutaneous injection of the SP1 cells alone did not result in malignant foci formation. Iyengar *et al.* (104) have recently defined the specific effects that adipocyte-derived secreted factors have on breast cancer cells and demonstrated that adipocyte-conditioned medium promotes tumorigenesis, including increased cell proliferation, invasive potential, survival, and angiogenesis. This observation was found in both estrogen-dependent as well as estrogen-independent breast cancer cell lines. It appears clear that adipocyte-secreted proteins may play an important and possibly necessary role for the development of some types of breast cancers. For example, type VI collagen, a soluble extracellular matrix protein abundantly expressed in adipocytes (105), was shown to be up-regulated in adipocytes during tumorigenesis and to be crit-

ical in tumor progression (104). Importantly, though, tumor progression may not necessarily depend on fat mass *per se*, but may be influenced more significantly by the specific metabolic state of the local adipocyte population. The key determinant for adipose tissue effects on tumorigenesis may involve the physiologically/pathologically induced secretory profile of the adipocytes in the local oncogenic microenvironments.

### Potential for Additional Factors

Pioneering work by Spiegelman, Flier, and colleagues in the mid- and late 1980s (106–108) focused for the first time on secretion of a soluble factor from adipocytes. They characterized adiponin, a circulating serine protease highly enriched in adipose tissue. Altered production and secretion of adipose tissue-specific proteins in genetic and acquired obesity was established. Presently, the repertoire of known adipocyte-specific or enriched factors has dramatically increased. Several papers that took either a genomics or a proteomics approach provide comprehensive lists of adipocyte-produced secretory factors. Scherer *et al.* (105) took advantage of a subtractive antibody approach to define adipose-enriched secretory products and identified proteins such as carbazide-sensitive amine oxidase, osteonectin, type VI collagen, and stromelysin as highly adipose-enriched factors. Guo and Liao (109) focused on 3T3-L1 differentiation using microarray analysis. Friedman and colleagues (110) took a microarray approach to identify differentially expressed genes in adipose tissue of *ob/ob* mice and compared it to adipose tissue from non-diabetic littermates and defined a subset of differentially regulated secretory proteins. Similarly, Pandey and colleagues (84) used a proteomics approach to identify secretory proteins from 3T3-L1 premature and mature adipocytes. Attie and colleagues (111, 112) used a microarray approach to study differential gene regulation in adipose tissue from lean, obese, and obese-diabetic mice and described that expression of a number of secretory proteins is altered in these states. All of these reports display vastly overlapping lists of secretory products and taken together, the proinflammatory potential of the tissue is abundantly clear. As with any microarray approach, these studies reveal a subset of cDNAs whose function still needs to be defined and whose adipose tissue-specific expression still needs to be verified. Inevitably, expression of some of these proteins will be linked to either systemic fat mass and/or insulin sensitivity. Importantly, correlations with fat mass can be either positive (leptin) or negative (adiponectin and adiponin). Despite the vast amount of information at the level of expression of individual proteins, very little is known about the extracellular factors and intracellular signaling mechanisms in place that are responsible for translating altered fat mass into different transcriptional programs. Many of the additional adipocyte-derived factors that may have important physiological effects are covered in separate reviews and were not mentioned in detail here (113, 114).

### Conclusion and Future Perspectives

Obesity is associated with a number of metabolic, endocrine, and cardiovascular complications that will become a



major drain on the medical system as the number of obese patients increases and as this population ages. Type 2 diabetes, typically a disease of older obese individuals, has now expanded to include an increasing number of young children (2). Adipose tissue is an active endocrine organ whose secretory and nonsecretory components have a major impact on the majority of obesity related complications.

Future work will hopefully shed additional mechanistic insights into the underlying reasons why an excess of adipose tissue is associated with a higher propensity toward insulin resistance. The receptors for many of the recently identified adipokines, including adiponectin and resistin, have yet to be identified. Serum cofactors that associate with these adipokines and potentially stimulate proteolytic cleavage to activate them also need to be isolated and identified.

Due to the large number of factors influencing insulin sensitivity and the development of insulin resistance, it is exceedingly unlikely that levels of any one factor will enable us to explain the development of insulin resistance. In light of this complexity, it is surprising how well the correlations between adiponectin and insulin sensitivity have consistently held up in a large number of clinical studies. Nevertheless, it is likely that an index will need to be developed that takes levels of a number of these adipokines (adiponectin, resistin, inflammatory cytokines) as well as free fatty acids and triglycerides into account before a complete model can take shape.

## Acknowledgments

Received May 9, 2003. Accepted June 3, 2003.

Address all correspondence and requests for reprints to: Philipp E. Scherer, Diabetes Research and Training Center, Albert Einstein College of Medicine, 1300 Morris Park Avenue, Bronx, New York 10461. E-mail: scherer@acom.yu.edu.

This work was supported by National Institutes of Health (NIH) Medical Scientist Training Grant T32-GM07288 (to M.R.) and by NIH Grant R01-DK55758 (to P.E.S.).

## References

1. Bluher M, Michael MD, Peroni OD, Ueki K, Carter N, Kahn BB, Kahn CR 2002 Adipose tissue selective insulin receptor knockout protects against obesity and obesity-related glucose intolerance. *Dev Cell* 3:25–38
2. Ogden CL, Flegal KM, Carroll MD, Johnson CL 2002 Prevalence and trends in overweight among US children and adolescents, 1999–2000. *JAMA* 288:1728–1732
3. Freedman DS, Khan LK, Serdula MK, Galuska DA, Dietz WH 2002 Trends and correlates of class 3 obesity in the United States from 1990 through 2000. *JAMA* 288:1758–1761
4. Flegal KM, Carroll MD, Ogden CL, Johnson CL 2002 Prevalence and trends in obesity among US adults, 1999–2000. *JAMA* 288:1723–1727
5. Gavrilova O, Marcus-Samuels B, Graham D, Kim JK, Shulman GI, Castle AL, Vinson C, Eckhaus M, Reitman ML 2000 Surgical implantation of adipose tissue reverses diabetes in lipotrophic mice. *J Clin Invest* 105:271–278
6. Petersen KF, Oral EA, Dufour S, Befroy D, Ariyan C, Yu C, Cline GW, DePaoli AM, Taylor SI, Gorden P, Shulman GI 2002 Leptin reverses insulin resistance and hepatic steatosis in patients with severe lipodystrophy. *J Clin Invest* 109:1345–1350
7. Moitra J, Mason MM, Olive M, Krylov D, Gavrilova O, Marcus-Samuels B, Feigenbaum L, Lee E, Aoyama T, Eckhaus M, Reitman ML, Vinson C 1998 Life without white fat: a transgenic mouse. *Genes Dev* 12:3168–3181
8. Kim JK, Gavrilova O, Chen Y, Reitman ML, Shulman GI 2000 Mechanism of insulin resistance in A-ZIP/F-1 fatless mice. *J Biol Chem* 275:8456–8460
9. Yu C, Chen Y, Cline GW, Zhang D, Zong H, Wang Y, Bergeron R, Kim JK, Cushman SW, Cooney GJ, Atcheson B, White ME, Kraegen EW, Shulman GI 2002 Mechanism by which fatty acids inhibit insulin activation of insulin receptor substrate-1 (IRS-1)-associated phosphatidylinositol 3-kinase activity in muscle. *J Biol Chem* 277:50230–50236
10. Yamauchi T, Kamon J, Waki H, Terauchi Y, Kubota N, Hara K, Mori Y, Ide T, Murakami K, Tsuboyama-Kasaoka N, Ezaki O, Akanuma Y, Gavrilova O, Vinson C, Reitman ML, Kagechika H, Shudo K, Yoda M, Nakano Y, Tobe K, Nagai R, Kimura S, Tomita M, Froguel P, Kadowaki T 2001 The fat-derived hormone adiponectin reverses insulin resistance associated with both lipotrophy and obesity. *Nat Med* 7:941–946
11. Zhang Y, Proenca R, Maffei M, Barone M, Leopold L, Friedman JM 1994 Positional cloning of the mouse obese gene and its human homologue. *Nature* 372:425–432
12. Friedman JM 2002 The function of leptin in nutrition, weight, and physiology. *Nutr Rev* 60:S1–S14
13. Niswender KD, Schwartz MW 2003 Insulin and leptin revisited: adiposity signals with overlapping physiological and intracellular signaling capabilities. *Front Neuroendocrinol* 24:1–10
14. Zigman JM, Elmquist JK 2003 Minireview: from anorexia to obesity—the yin and yang of body weight control. *Endocrinology* 144:3749–3756
15. Pellemounter MA, Cullen MJ, Baker MB, Hecht R, Winters D, Boone T, Collins F 1995 Effects of the obese gene product on body weight regulation in ob/ob mice. *Science* 269:540–543
16. Halaas JL, Gajiwala KS, Maffei M, Cohen SL, Chait BT, Rabinowitz D, Lallone RL, Burley SK, Friedman JM 1995 Weight-reducing effects of the plasma protein encoded by the obese gene. *Science* 269:543–546
17. Levin N, Nelson C, Gurney A, Vandlen R, de Sauvage F 1996 Decreased food intake does not completely account for adiposity reduction after ob protein infusion. *Proc Natl Acad Sci USA* 93:1726–1730
18. Ahima RS, Prabakaran D, Mantzoros C, Qu D, Lowell B, Maratos-Flier E, Flier JS 1996 Role of leptin in the neuroendocrine response to fasting. *Nature* 382:250–252
19. Minokoshi Y, Kim YB, Peroni OD, Fryer LG, Muller C, Carling D, Kahn BB 2002 Leptin stimulates fatty-acid oxidation by activating AMP-activated protein kinase. *Nature* 415:339–343
20. Minokoshi Y, Kahn BB 2003 Role of AMP-activated protein kinase in leptin-induced fatty acid oxidation in muscle. *Biochem Soc Trans* 31:196–201
21. Oral EA, Simha V, Ruiz E, Andewelt A, Premkumar A, Snell P, Wagner AJ, DePaoli AM, Reitman ML, Taylor SI, Gorden P, Garg A 2002 Leptin-replacement therapy for lipodystrophy. *N Engl J Med* 346:570–578
22. Savage DB, O'Rahilly S 2002 Leptin: a novel therapeutic role in lipodystrophy. *J Clin Invest* 109:1285–1286
23. Huang L, Li C 2000 Leptin: a multifunctional hormone. *Cell Res* 10:81–92
24. Farooqi IS, Matarese G, Lord GM, Keogh JM, Lawrence E, Agwu C, Sanna V, Jebb SA, Perna F, Fontana S, Lechler RI, DePaoli AM, O'Rahilly S 2002 Beneficial effects of leptin on obesity, T cell hyporesponsiveness, and neuroendocrine/metabolic dysfunction of human congenital leptin deficiency. *J Clin Invest* 110:1093–1103
25. Lord GM, Matarese G, Howard JK, Baker RJ, Bloom SR, Lechler RI 1998 Leptin modulates the T-cell immune response and reverses starvation-induced immunosuppression. *Nature* 394:897–901
26. Popovic V, Damjanovic S, Dieguez C, Casanueva FF 2001 Leptin and the pituitary. *Pituitary* 4:7–14
27. Ahima RS, Prabakaran D, Flier JS 1998 Postnatal leptin surge and regulation of circadian rhythm of leptin by feeding. Implications for energy homeostasis and neuroendocrine function. *J Clin Invest* 101:1020–1027
28. O'Rahilly S, Sadaf Farooqi I, Yeo GSH, Challis BG 2003 Minireview: human obesity—lessons from monogenic disorders. *Endocrinology* 144:3757–3764
29. Hukshorn CJ, van Dielen FM, Buurman WA, Westerterp-Plantenga MS, Campfield LA, Saris WH 2002 The effect of pegylated recombinant human leptin (PEG-OB) on weight loss and inflammatory status in obese subjects. *Int J Obes Relat Metab Disord* 26:504–509
30. Banks WA 2001 Leptin transport across the blood-brain barrier: implications for the cause and treatment of obesity. *Curr Pharm Des* 7:125–133
31. Caro JF, Kolaczynski JW, Nyce MR, Ohannesian JP, Opentanova I, Goldman WH, Lynn RB, Zhang PL, Sinha MK, Considine RV 1996 Decreased cerebrospinal-fluid/serum leptin ratio in obesity: a possible mechanism for leptin resistance. *Lancet* 348:159–161
32. Combs TP, Berg AH, Rajala MW, Klebanov S, Iyengar P, Jimenez-Chillaron JC, Patti ME, Klein SL, Weinstein RS, Scherer PE 2003 Sexual differentiation, pregnancy, calorie restriction and aging affect the adipocyte-specific secretory protein Acrp30/adiponectin. *Diabetes* 52:268–276
33. Scherer PE, Williams S, Fogliano M, Baldini G, Lodish HF 1995 A novel serum protein similar to C1q, produced exclusively in adipocytes. *J Biol Chem* 270:26746–26749
34. Pajvani UB, Du X, Combs TP, Berg AH, Rajala MW, Schulthess T, Engel J, Brownlee M, Scherer PE 2002 Structure-function studies of the adipocyte-secreted hormone Acrp30/adiponectin: implications for metabolic regulation and bioactivity. *J Biol Chem* 278:9073–9085
35. Fruebis J, Tsao TS, Javorschi S, Ebbets-Reed D, Erickson MR, Yen FT, Bihain BE, Lodish HF 2001 Proteolytic cleavage product of 30-kDa adipocyte complement-related protein increases fatty acid oxidation in muscle and causes weight loss in mice. *Proc Natl Acad Sci USA* 98:2005–2010
36. Hotta K, Funahashi T, Bodkin NL, Ortmeier HK, Arita Y, Hansen BC, Matsuzawa Y 2001 Circulating concentrations of the adipocyte protein adi-

- ponectin are decreased in parallel with reduced insulin sensitivity during the progression to type 2 diabetes in rhesus monkeys. *Diabetes* 50:1126–1133
37. Arita Y, Kihara S, Ouchi N, Maeda K, Miyagawa J, Hotta K, Shimomura I, Nakamura T, Miyaoka K, Kuriyama H, Nishida M, Yamashita S, Okubo K, Matsubara K, Muraguchi M, Ohmoto Y, Funahashi T, Matsuzawa Y 1999 Paradoxical decrease of an adipose-specific protein, adiponectin, in obesity. *Biochem Biophys Res Commun* 257:79–83
  38. Hotta K, Funahashi T, Arita Y, Takahashi M, Matsuda M, Okamoto Y, Iwahashi H, Kuriyama H, Ouchi N, Maeda K, Nishida M, Kihara S, Sakai N, Nakajima T, Hasegawa K, Muraguchi M, Ohmoto Y, Nakamura T, Yamashita S, Hanafusa T, Matsuzawa Y 2000 Plasma concentrations of a novel, adipose-specific protein, adiponectin, in type 2 diabetic patients. *Arterioscler Thromb Vasc Biol* 20:1595–1599
  39. Weyer C, Funahashi T, Tanaka S, Hotta K, Matsuzawa Y, Pratley RE, Tataranni PA 2001 Hypoadiponectinemia in obesity and type 2 diabetes: close association with insulin resistance and hyperinsulinemia. *J Clin Endocrinol Metab* 86:1930–1935
  40. Yang WS, Lee WJ, Funahashi T, Tanaka S, Matsuzawa Y, Chao CL, Chen CL, Tai TY, Chuang LM 2001 Weight reduction increases plasma levels of an adipose-derived anti-inflammatory protein, adiponectin. *J Clin Endocrinol Metab* 86:3815–3819
  41. Spranger J, Kroke A, Mohlig M, Bergmann MM, Ristow M, Boeing H, Pfeiffer AF 2003 Adiponectin and protection against type 2 diabetes mellitus. *Lancet* 361:226–228
  42. Kissebah AH, Sonnenberg G, Myklebust J, Goldstein M, Broman K, James RG, Marks JA, Krakower GR, Jacob HJ, Weber J, Martin L, Blangero J, Comuzzie AG 2000 Quantitative trait loci on chromosomes 3 and 17 influence phenotypes of the metabolic syndrome. *Proc Natl Acad Sci USA* 97:14478–14483
  43. Vionnet N, Hani El H, Dupont S, Gallina S, Francke S, Dotte S, De Matos F, Durand E, Lepretre F, Lecoecur C, Gallina P, Zekiri L, Dina C, Froguel P 2000 Genomewide search for type 2 diabetes-susceptibility genes in French whites: evidence for a novel susceptibility locus for early-onset diabetes on chromosome 3q27-qter and independent replication of a type 2-diabetes locus on chromosome 1q21–q24. *Am J Hum Genet* 67:1470–1480
  44. Takahashi M, Arita Y, Yamagata K, Matsukawa Y, Okutomi K, Horie M, Shimomura I, Hotta K, Kuriyama H, Kihara S, Nakamura T, Yamashita S, Funahashi T, Matsuzawa Y 2000 Genomic structure and mutations in adipose-specific gene, adiponectin. *Int J Obes Relat Metab Disord* 24:861–868
  45. Vasseur F, Lepretre F, Lacquemant C, Froguel P 2003 The genetics of adiponectin. *Curr Diab Rep* 3:151–158
  46. Berg AH, Combs TP, Scherer PE 2002 ACRP30/adiponectin: an adipokine regulating glucose and lipid metabolism. *Trends Endocrinol Metab* 13:84–89
  47. Combs TP, Wagner JA, Berger J, Doeber T, Wang WJ, Zhang BB, Tanen M, Berg AH, O'Rahilly S, Savage DB, Chatterjee K, Weiss S, Larson PJ, Gottesdiener KM, Gertz BJ, Charron MJ, Scherer PE, Moller DE 2002 Induction of adipocyte complement-related protein of 30 kilodaltons by PPAR $\gamma$  agonists: a potential mechanism of insulin sensitization. *Endocrinology* 143:998–1007
  48. Maeda N, Shimomura I, Kishida K, Nishizawa H, Matsuda M, Nagaretani H, Furuyama N, Kondo H, Takahashi M, Arita Y, Komuro R, Ouchi N, Kihara S, Tochino Y, Okutomi K, Horie M, Takeda S, Aoyama T, Funahashi T, Matsuzawa Y 2002 Diet-induced insulin resistance in mice lacking adiponectin/ACRP30. *Nat Med* 8:731–737
  49. Fasshauer M, Klein J, Neumann S, Eszlinger M, Paschke R 2002 Hormonal regulation of adiponectin gene expression in 3T3-L1 adipocytes. *Biochem Biophys Res Commun* 290:1084–1089
  50. Yamauchi T, Kamon J, Waki H, Imai Y, Shimozawa N, Hioki K, Uchida S, Ito Y, Takakuwa K, Matsui J, Takata M, Eto K, Terauchi Y, Komeda K, Tsunoda M, Murakami K, Ohnishi Y, Naitoh T, Yamamura K, Ueyama Y, Froguel P, Kimura S, Nagai R, Kadowaki T 2002 Global adiponectin protected ob/ob mice from diabetes and apoE deficient mice from atherosclerosis. *J Biol Chem* 278:2461–2468
  51. Kubota N, Terauchi Y, Yamauchi T, Kubota T, Moroi M, Matsui J, Eto K, Yamashita T, Kamon J, Satoh H, Yano W, Froguel P, Nagai R, Kimura S, Kadowaki T, Noda T 2002 Disruption of adiponectin causes insulin resistance and neointimal formation. *J Biol Chem* 277:25863–25866
  52. Cohen AW, Razani B, Wang XB, Combs TP, Williams TM, Scherer PE, Lisanti MP 2003 Caveolin-1 deficient mice show post-prandial hyperinsulinemia, insulin resistance, and defective insulin receptor (IR- $\beta$ ) protein expression in adipose tissue. *Am J Physiol Cell Physiol* C222–C235
  53. Razani B, Combs TP, Wang XB, Frank PG, Park DS, Russell RG, Li M, Tang B, Jelicks LA, Scherer PE, Lisanti MP 2002 Caveolin-1-deficient mice are lean, resistant to diet-induced obesity, and show hypertriglyceridemia with adipocyte abnormalities. *J Biol Chem* 277:8635–8647
  54. Abel ED, Peroni O, Kim JK, Kim YB, Boss O, Hadro E, Minnemann T, Shulman GI, Kahn BB 2001 Adipose-selective targeting of the GLUT4 gene impairs insulin action in muscle and liver. *Nature* 409:729–733
  55. Berg AH, Combs TP, Du X, Brownlee M, Scherer PE 2001 The adipocyte-secreted protein Acrp30 enhances hepatic insulin action. *Nat Med* 7:947–953
  56. Yamauchi T, Kamon J, Minokoshi Y, Ito Y, Waki H, Uchida S, Yamashita S, Noda M, Kita S, Ueki K, Eto K, Akanuma Y, Froguel P, Foufelle F, Ferre P, Carling D, Kimura S, Nagai R, Kahn BB, Kadowaki T 2002 Adiponectin stimulates glucose utilization and fatty-acid oxidation by activating AMP-activated protein kinase. *Nat Med* 8:1288–1295
  57. Steppan CM, Bailey ST, Bhat S, Brown EJ, Banerjee RR, Wright CM, Patel HR, Ahima RS, Lazar MA 2001 The hormone resistin links obesity to diabetes. *Nature* 409:307–312
  58. Rajala MW, Obici S, Scherer PE, Rossetti L 2003 Adipose-derived resistin and gut-derived resistin-like molecule- $\beta$  selectively impair insulin action on glucose production. *J Clin Invest* 111:225–230
  59. Way JM, Gorgun CZ, Tong Q, Uysal KT, Brown KK, Harrington WW, Oliver WR Jr, Willson TM, Klierer SA, Hotamisligil GS 2001 Adipose tissue resistin expression is severely suppressed in obesity and stimulated by peroxisome proliferator-activated receptor  $\gamma$  agonists. *J Biol Chem* 276:25651–25653
  60. Seo JB, Noh MJ, Yoo EJ, Park SY, Park J, Lee IK, Park SD, Kim JB 2003 Functional characterization of the human resistin promoter with adipocyte determination- and differentiation-dependent factor 1/sterol regulatory element binding protein 1c and CCAAT enhancer binding protein- $\alpha$ . *Mol Endocrinol* 17:1522–1533
  61. Janke J, Engeli S, Gorzelnik K, Luft FC, Sharma AM 2002 Resistin gene expression in human adipocytes is not related to insulin resistance. *Obes Res* 10:1–5
  62. Patel L, Buckels AC, Kinghorn IJ, Murdock PR, Holbrook JD, Plumpton C, Macphree CH, Smith SA 2003 Resistin is expressed in human macrophages and directly regulated by PPAR  $\gamma$  activators. *Biochem Biophys Res Commun* 300:472–476
  63. Fain JN, Cheema PS, Bahouth SW, Lloyd Hiler M 2003 Resistin release by human adipose tissue explants in primary culture. *Biochem Biophys Res Commun* 300:674–678
  64. Vidal-Puig A, O'Rahilly S 2001 Resistin: a new link between obesity and insulin resistance? *Clin Endocrinol (Oxf)* 55:437–438
  65. Savage DB, Sewter CP, Klenk ES, Segal DG, Vidal-Puig A, Considine RV, O'Rahilly S 2001 Resistin/Fizz3 expression in relation to obesity and peroxisome proliferator-activated receptor- $\gamma$  action in humans. *Diabetes* 50:2199–2202
  66. McTernan CL, McTernan PG, Harte AL, Levick PL, Barnett AH, Kumar S 2002 Resistin, central obesity, and type 2 diabetes. *Lancet* 359:46–47
  67. McTernan PG, McTernan CL, Chetty R, Jenner K, Fisher FM, Lauer MN, Crocker J, Barnett AH, Kumar S 2002 Increased resistin gene and protein expression in human abdominal adipose tissue. *J Clin Endocrinol Metab* 87:2407
  68. Zhang J, Qin Y, Zheng X, Qiu J, Gong L, Mao H, Jia W, Guo J 2002 [The relationship between human serum resistin level and body fat content, plasma glucose as well as blood pressure]. *Zhonghua Yi Xue Za Zhi* 82:1609–1612
  69. Sniderman AD, Maslowska M, Cianflone K 2000 Of mice and men (and women) and the acylation-stimulating protein pathway. *Curr Opin Lipidol* 11:291–296
  70. Xia Z, Sniderman AD, Cianflone K 2002 Acylation-stimulating protein (ASP) deficiency induces obesity resistance and increased energy expenditure in ob/ob mice. *J Biol Chem* 277:45874–45879
  71. Faraj M, Havel PJ, Phelis S, Blank D, Sniderman AD, Cianflone K 2003 Plasma acylation-stimulating protein, adiponectin, leptin, and ghrelin before and after weight loss induced by gastric bypass surgery in morbidly obese subjects. *J Clin Endocrinol Metab* 88:1594–1602
  72. Roh C, Roduit R, Thorens B, Fried S, Kandror KV 2001 Lipoprotein lipase and leptin are accumulated in different secretory compartments in rat adipocytes. *J Biol Chem* 276:35990–35994
  73. Roh C, Thoidis G, Farmer SR, Kandror KV 2000 Identification and characterization of leptin-containing intracellular compartment in rat adipose cells. *Am J Physiol Endocrinol Metab* 279:E893–E899
  74. Hotamisligil GS, Spiegelman BM 1994 Tumor necrosis factor  $\alpha$ : a key component of the obesity-diabetes link. *Diabetes* 43:1271–1278
  75. Hotamisligil GS, Budavari A, Murray D, Spiegelman BM 1994 Reduced tyrosine kinase activity of the insulin receptor in obesity-diabetes. Central role of tumor necrosis factor- $\alpha$ . *J Clin Invest* 94:1543–1549
  76. Pickup JC, Mattock MB, Chusney GD, Burt D 1997 NIDDM as a disease of the innate immune system: association of acute-phase reactants and interleukin-6 with metabolic syndrome X. *Diabetologia* 40:1286–1292
  77. Lin Y, Rajala MW, Berger JP, Moller DE, Barzilai N, Scherer PE 2001 Hyperglycemia-induced production of acute phase reactants in adipose tissue. *J Biol Chem* 276:42077–42083
  78. Plutzky J 2001 Inflammatory pathways in atherosclerosis and acute coronary syndromes. *Am J Cardiol* 88:10K–15K
  79. Artl A, Marsche G, Lestavel S, Sattler W, Malle E 2000 Role of serum amyloid A during metabolism of acute-phase HDL by macrophages. *Arterioscler Thromb Vasc Biol* 20:763–772
  80. Abderrahim-Ferkoune A, Bezy O, Chiellini C, Maffei M, Grimaldi P, Bonino F, Moustaid-Moussa N, Pasqualini F, Mantovani A, Ailhaud G, Amri EZ 2003 Characterization of the long pentraxin PTX3 as a TNF $\alpha$ -induced, secreted protein of adipose cells. *J Lipid Res* 44:994–1000
  81. Yang J, Goetz D, Li JY, Wang W, Mori K, Setlik D, Du T, Erdjument-



- Bromage H, Tempst P, Strong R, Barasch J 2002 An iron delivery pathway mediated by a lipocalin. *Mol Cell* 10:1045–1056
82. Goetz DH, Holmes MA, Borregaard N, Bluhm ME, Raymond KN, Strong RK 2002 The neutrophil lipocalin NGAL is a bacteriostatic agent that interferes with siderophore-mediated iron acquisition. *Mol Cell* 10:1033–1043
83. Hirokawa J, Sakaue S, Tagami S, Kawakami Y, Sakai M, Nishi S, Nishihira J 1997 Identification of macrophage migration inhibitory factor in adipose tissue and its induction by tumor necrosis factor- $\alpha$ . *Biochem Biophys Res Commun* 235:94–98
84. Kratchmarova I, Kalume DE, Blagoev B, Scherer PE, Podtelejnikov AV, Molina H, Bickel PE, Andersen JS, Fernandez MM, Bunkenborg J, Roepstorff P, Kristiansen K, Lodish HF, Mann M, Pandey A 2002 A proteomic approach for identification of secreted proteins during the differentiation of 3T3-L1 preadipocytes to adipocytes. *Mol Cell Proteomics* 1:213–222
85. Juge-Aubry CE, Somm E, Giusti V, Pemin A, Chicheportiche R, Verdumo C, Rohner-Jeanrenaud F, Burger D, Dayer JM, Meier CA 2003 Adipose tissue is a major source of interleukin-1 receptor antagonist: upregulation in obesity and inflammation. *Diabetes* 52:1104–1110
86. Lin Y, Lee H, Berg AH, Lisanti MP, Shapiro L, Scherer PE 2000 LPS activated TLR-4 receptor induces synthesis of the closely related receptor TLR-2 in adipocytes. *J Biol Chem* 275:24255–24263
87. Bing Z, Huang JH, Liao WS 2000 NF $\kappa$ B interacts with SEF to synergistically activate mouse serum amyloid A3 gene transcription. *J Biol Chem* 275:31616–31623
88. Tzou P, De Gregorio E, Lemaitre B 2002 How *Drosophila* combats microbial infection: a model to study innate immunity and host-pathogen interactions. *Curr Opin Microbiol* 5:102–110
89. Charriere G, Cousin B, Arnaud E, Andre M, Bacou F, Penicaud L, Casteilla L 2003 Preadipocyte conversion to macrophage. Evidence of plasticity. *J Biol Chem* 278:9850–9855
90. Yuan M, Konstantopoulos N, Lee J, Hansen L, Li ZW, Karin M, Shoelson SE 2001 Reversal of obesity- and diet-induced insulin resistance with salicylates or targeted disruption of I $\kappa$ B. *Science* 293:1673–1677
91. Kim JK, Kim YJ, Fillmore JJ, Chen Y, Moore I, Lee J, Yuan M, Li ZW, Karin M, Perret P, Shoelson SE, Shulman GI 2001 Prevention of fat-induced insulin resistance by salicylate. *J Clin Invest* 108:437–446
92. Hundal RS, Petersen KF, Mayerson AB, Randhawa PS, Inzucchi S, Shoelson SE, Shulman GI 2002 Mechanism by which high-dose aspirin improves glucose metabolism in type 2 diabetes. *J Clin Invest* 109:1321–1326
93. Hirosumi J, Tuncman G, Chang L, Gorgun CZ, Uysal KT, Maeda K, Karin M, Hotamisligil GS 2002 A central role for JNK in obesity and insulin resistance. *Nature* 420:333–336
94. Rupnick MA, Panigrahy D, Zhang CY, Dallabrida SM, Lowell BB, Langer R, Folkman MJ 2002 Adipose tissue mass can be regulated through the vasculature. *Proc Natl Acad Sci USA* 99:10730–10735
95. Wilkison WO, Spiegelman BM 1993 Biosynthesis of the vasoactive lipid monobutyrin. Central role of diacylglycerol. *J Biol Chem* 268:2844–2849
96. Wilkison WO, Choy L, Spiegelman BM 1991 Biosynthetic regulation of monobutyrin, an adipocyte-secreted lipid with angiogenic activity. *J Biol Chem* 266:16886–16891
97. Dobson DE, Kambe A, Block E, Dion T, Lu H, Castellot Jr JJ, Spiegelman BM 1990 1-Butyryl-glycerol: a novel angiogenesis factor secreted by differentiating adipocytes. *Cell* 61:223–230
98. Mick GJ, Wang X, McCormick K 2002 White adipocyte vascular endothelial growth factor: regulation by insulin. *Endocrinology* 143:948–953
99. Calle EE, Rodriguez C, Walker-Thurmond K, Thun MJ 2003 Overweight, obesity, and mortality from cancer in a prospectively studied cohort of U. S. adults. *N Engl J Med* 348:1625–1638
100. Elenbaas B, Weinberg RA 2001 Heterotypic signaling between epithelial tumor cells and fibroblasts in carcinoma formation. *Exp Cell Res* 264:169–184
101. Wiseman BS, Werb Z 2002 Stromal effects on mammary gland development and breast cancer. *Science* 296:1046–1049
102. Morimoto LM, White E, Chen Z, Chlebowski RT, Hays J, Kuller L, Lopez AM, Manson J, Margolis KL, Muti PC, Stefanick ML, McTiernan A 2002 Obesity, body size, and risk of postmenopausal breast cancer: the Women's Health Initiative (United States). *Cancer Causes Control* 13:741–751
103. Elliott BE, Tam SP, Dexter D, Chen ZQ 1992 Capacity of adipose tissue to promote growth and metastasis of a murine mammary carcinoma: effect of estrogen and progesterone. *Int J Cancer* 51:416–424
104. Iyengar P, Combs TP, Shah SJ, Gouon-Evans V, Pollard JW, Albanese C, Flanagan L, Tenniswood MP, Guha C, Lisanti MP, Pestell R, Scherer PE, Adipocyte secreted factors synergistically promote mammary tumorigenesis through induction of anti-apoptotic transcriptional programs and proto-oncogene stabilization. *Oncogene*, in press
105. Scherer PE, Bickel PE, Kotler M, Lodish HF 1998 Subtractive antibody screening: a new method to clone cell-specific secreted and surface proteins. *Nat Biotechnol* 16:581–586
106. Rosen BS, Cook KS, Yaglom J, Groves DL, Volanakis JE, Damm D, White T, Spiegelman BM 1989 Adipsin and complement factor D activity: an immune-related defect in obesity. *Science* 244:1483–1487
107. Flier JS, Cook KS, Usher P, Spiegelman BM 1987 Severely impaired adipsin expression in genetic and acquired obesity. *Science* 237:405–408
108. Cook KS, Min HY, Johnson D, Chaplinsky RJ, Flier JS, Hunt CR, Spiegelman BM 1987 Adipsin: a circulating serine protease homolog secreted by adipose tissue and sciatic nerve. *Science* 237:402–405
109. Guo X, Liao K 2000 Analysis of gene expression profile during 3T3-L1 preadipocyte differentiation. *Gene* 251:45–53
110. Soukas A, Cohen P, Socci ND, Friedman JM 2000 Leptin-specific patterns of gene expression in white adipose tissue. *Genes Dev* 14:963–980
111. Lan H, Rabaglia ME, Stoehr JP, Nadler ST, Schueler KL, Zou F, Yandell BS, Attie AD 2003 Gene expression profiles of nondiabetic and diabetic obese mice suggest a role of hepatic lipogenic capacity in diabetes susceptibility. *Diabetes* 52:688–700
112. Nadler ST, Stoehr JP, Schueler KL, Tanimoto G, Yandell BS, Attie AD 2000 The expression of adipogenic genes is decreased in obesity and diabetes mellitus. *Proc Natl Acad Sci USA* 97:11371–11376
113. Mohamed-Ali V, Pinkney JH, Coppack SW 1998 Adipose tissue as an endocrine and paracrine organ. *Int J Obes Relat Metab Disord* 22:1145–1158
114. Ahima RS, Flier JS 2000 Adipose tissue as an endocrine organ. *Trends Endocrinol Metab* 11:327–332
